# Supplementary material for: Cellular and Subcellular Compartmentation of the 2C-Methyl-D-Erythritol 4-Phosphate Pathway in the Madagascar Periwinkle
Source: PubMed Central journal article supplement (PMC7238098; doi:10.3390/plants9040462), 2020-04-07
Supplement: plants-09-00462-s001.pdf [file plants-09-00462-s001.pdf]

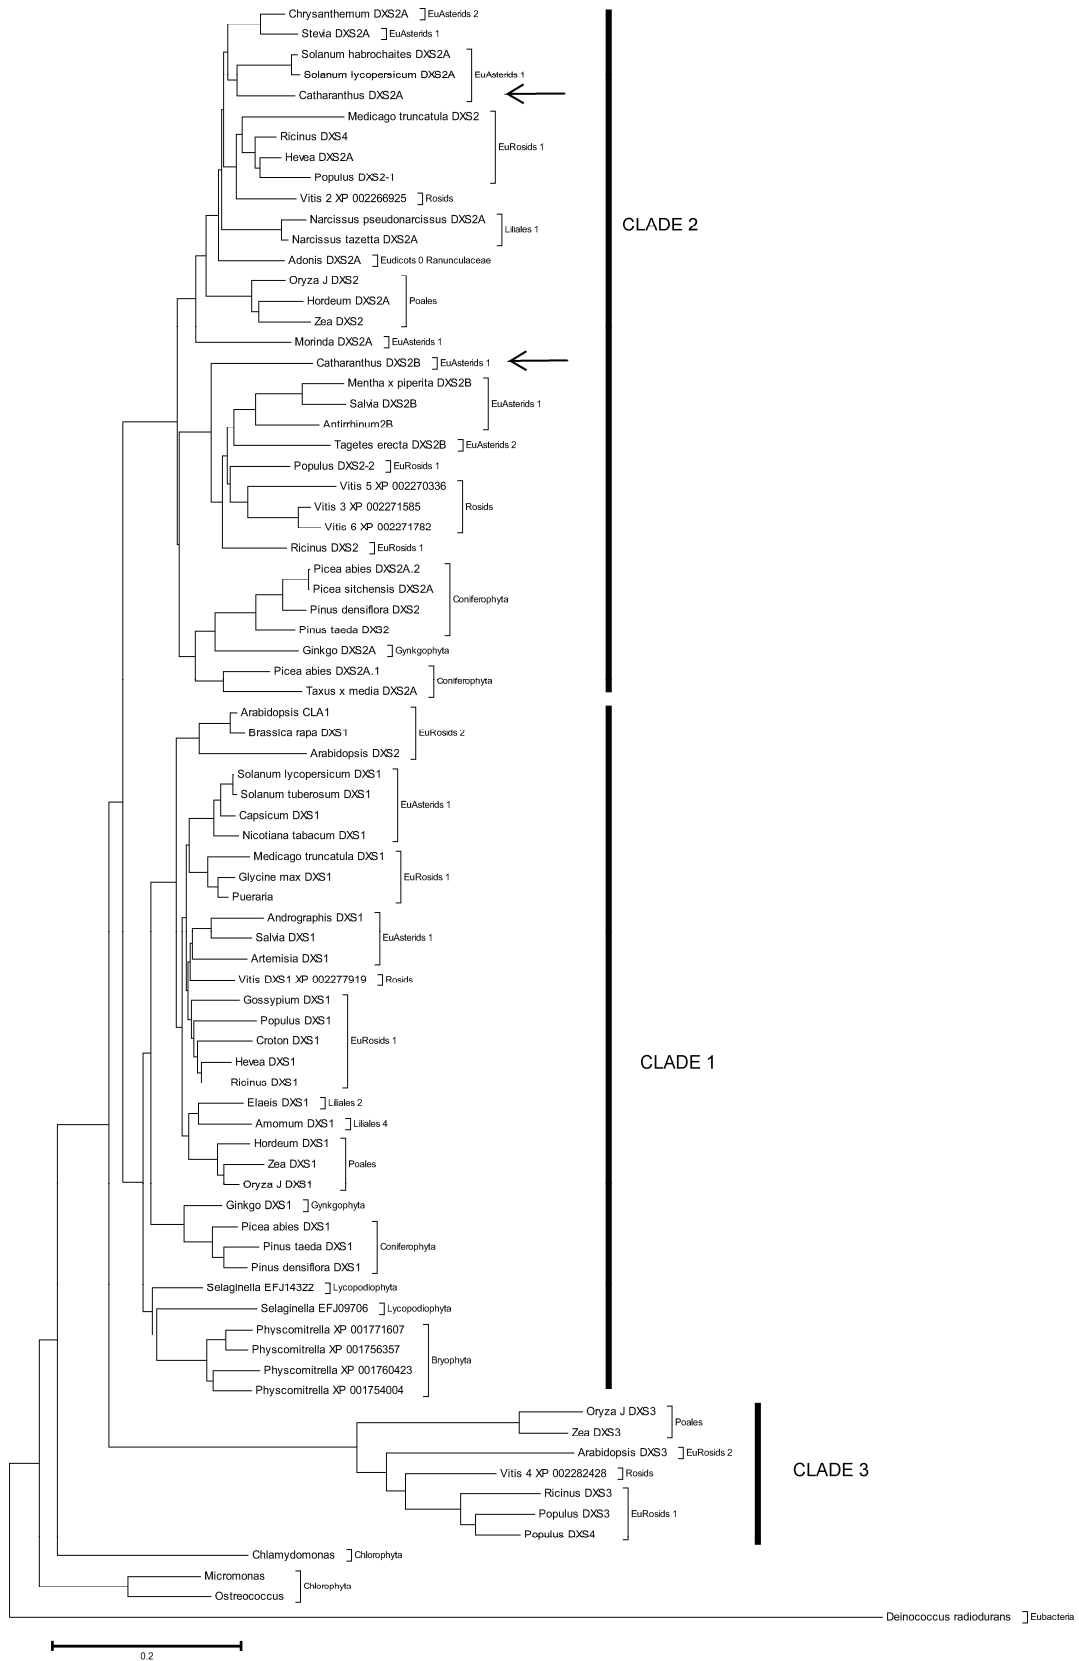

**Supplemental Figure S1.** A phylogenetic tree was constructed from the amino acid sequence of DXS from the following species : *Adonis aestivalis* (ABK35283.1) ; *Amomum villosum* (ACR02668.1) ; *Andrographis paniculata* (AAP14353.1) ; *Arabidopsis thaliana* (CLA1 At4g15560 ; DXS2 At3g21500; DXS3 AT5G11380); *Artemisia annua* (AAD56390.2) ; *Antirrhinum majus* (AAW28999.1) ; *Brassica rapa* (ABE60813.1) ; *Capsicum annuum* (CAA75778.1) ; *Catharanthus roseus* (DXS2.1 renamed DXS2A CAA09804.2, DXS2.2 renamed DXS2B ABI35993.1) ; *Chlamydomonas reinhardtii* (CAA07554.1) ; *Chrysanthemum x morifolium* (BAE79547.1) ; *Croton stellatopilosus* (BAF75640.1) ; *Deinococcus radiodurans* R1 (NP\_295198.1) ; *Elaeis guineensis* (AAS99588.1) ; *Glycine max* (ACO72582.1) ; *Ginkgo biloba* (DXS1 AAS89341.1, DXS2 AAR95699.1) ; *Gossypium barbadense* (ABN13970.1) ; *Hordeum vulgare* (BAJ94232.1, BAJ98888.1) ; *Hevea brasiliensis* (DXS1 clade AAS94123.1, DXS2 clade ABF18929.1; BAF98288.1) ; *Medicago truncatula* (DXS1, CAD22530.1, DXS2, CAN89181.1) ; *Mentha piperita* (AAC33513) ; *Morinda citrifolia* (AAL32062.1) ; *Narcissus pseudonarcissus* (CAC08458.1) ; *Narcissus tazetta* (ADD82535.1) ; *Nicotiana tabacum* (CBA12009.1) ; *Oryza sativa* (DXS1 NP\_001055524, DXS2 NP\_001059086, DXS3 clade BAD67657.1) ; *Ostreococcus lucimarinus* (XP\_001416190.1) ; *Physcomitrella patens* (XP\_001771607, XP\_001756357, XP\_001760423, XP\_001754004) ; *Picea abies* (ABS50519.1 ; ABS50518.1) ; *Picea sitchensis* (ACN39837.1) ; *Picrorhiza kurrooa* LAMIALES (ACB55417.1) ; *Pinus densiflora* (DXS1 ACC54557.1, DXS2 ACC54554.1) ; *Pinus taeda* (DXS1 ACJ67021.1, DXS2 ACJ67020.1) ; *Populus trichocarpa* (DXS1 XP\_002312717.1, DXS2 XP\_002303416.1, XP\_002331678.1, DXS3 XP\_002308644.1) ; *Pueraria montana* (AAQ84169.1) ; *Ricinus communis* (DXS1 XP\_002516843.1, DXS2 XP\_002533688.1, DXS3 XP\_002514364.1 ; DXS4 XP\_002532384.1) ; *Salvia miltiorrhiza* (DXS1 ACF21004.1, DXS2 ACQ66107.1) ; *Selaginella moellendorffii* (EFJ14322.1) ; *Sorghum bicolor* (XP\_002441088) ; *Solanum lycopersicum* (CAZ66648 ; AF143812\_1) ; *Solanum tuberosum* (DXS1 ADK73609.1) ; *Stevia rebaudiana* (ACI43010) ; *Taxus x media* (AAS89342.1) ; *Vitis vinifera* (DXS1, XP\_002277919 ; DXS2, XP\_002266925 ; DXS3, XP\_002271585 ; DXS4, XP\_002282428 ; DXS5, XP\_002270336 ; DXS6, XP\_002271782) ; *Zea mays* (DXS1 ABP88134.1, DXS2 : ABP88135.1, DXS3 ADN 22972). Note that *C. roseus* DXS2.1 and DXS2.2 have been renamed DXS2A and DXS2B in this tree.

| Enzyme        | Primer        | Sequence (5' – 3')                | Amplification           |
|---------------|---------------|-----------------------------------|-------------------------|
| <b>DXS2.2</b> | DXS2forA      | GGAGATAGTGTATTCTGTGGCCA           | 3' end with T7          |
|               | DXS2-rev1     | CTATCTCCTCCCTTAATTCGTCAGC         | 5' end with M13 reverse |
|               | DXS2-full-for | CGACGAGTACTCTAGCATTCCTATCCTC      | Full-length ORF         |
|               | DXS2-full-rev | CCTAATTCACAAATTGTATTTCATCACCAAGTA |                         |
| <b>CMS</b>    | CMS1          | GGNCAGCCWATTGCHTTRTA              | Internal cDNA fragment  |
|               | CMS3          | TCATCRGGTGTHGTNACCTT              |                         |
|               | CMS7          | AGCGGAGGATGTTGAGAAGGT             | 3' end with T7          |
|               | CMS5          | TCAGGCATGCGGAGAAAGTA              | 5' end with M13 reverse |
|               | CMS11         | AGAAGATGTCAATCTCTCGGC             | Full-length ORF         |
|               | CMS12         | GAATTACTATGCAGAGATGGG             |                         |
| <b>CMK</b>    | CMKfor        | CATGAYYTRGCITCHYITTTTCAT          | Internal cDNA fragment  |
|               | CMKrev        | GTTGCWGCATTRCTRCTYCCWCC           |                         |
|               | 3CMKfor1      | GGTTCATCTCGATAAAAAGGTGCC          | 3' end with T7          |
|               | 5CMKrev1      | GTTATCAGTGCCAGTCTTCTTCTAT         | 5' end with M13 reverse |
|               | CMK-full-for  | GGATAGACAAAAGGCATATCTTGAATG       | Full-length ORF         |
|               | CMK-full-rev  | TGGTTTTGGCATTATAACCATTTTC         |                         |
| <b>HDR</b>    | LytCR8        | GAGCGTGCWGTYCARATTG               | Internal cDNA fragment  |
|               | LytCR10       | GAGCGTGCWGTYCARATTG               |                         |
|               | LytCR12       | GATCCAGATGAGGATCTCAT              | 3' end with T7          |
|               | LytCR13       | GATTGTGAATAATTCATTCGTA            | 5' end with M13 reverse |
|               | HDR1          | ACAATGGCAATCTCTCTCAA              | Full-length ORF         |
|               | HDR2          | AATCTATGCCAGTTGAAGGGC             |                         |

**Supplemental Table S1.** Details of primer sequences and cloning procedure used to amplify the *DXS2.2*, *CMS*, *CMK* and *HDR* cDNAs.

| Enzyme        | Primer sequence (5'-3')                                                | Restriction site added | Plasmids <i>cloning sites</i>            | Complemented <i>E. coli</i> strain                     |
|---------------|------------------------------------------------------------------------|------------------------|------------------------------------------|--------------------------------------------------------|
| <b>DXS2.2</b> | <b>pQE-DXS2-Hindfor</b><br>GCAAGCTGTGCTGCTCATGGGCATGCT                 | <i>Hind</i> III        | pQE-30<br><i>Hind</i> III                | EcAB4-2<br>(MG1655 <i>dxs::CAT</i><br><i>MVA</i> +) )  |
|               | <b>pQE-DXS2-Hindrev</b><br>GCAAGCTTCTAAAAGTGGAGAAGCTGAAAGAG<br>TATTCTT | <i>Hind</i> III        |                                          |                                                        |
| <b>CMS</b>    | <b>pQE-CMSBam</b><br>TCGGATCCGAGAAAAGTGTCTCGGTAATTCT                   | <i>Bam</i> HI          | pQE-30<br><i>Bam</i> HI- <i>Hind</i> III | EcAB4-7<br>(MG1655 <i>ygbP::CAT</i><br><i>MVA</i> +) ) |
|               | <b>pQE-CMSHind</b><br>TCAAGCTTAGCAGAGATGGGATCAAATTC<br>T               | <i>Hind</i> III        |                                          |                                                        |
| <b>CMK</b>    | <b>pQE-CMKBam</b><br>ACGGATCCTGGAATAAGCTAGCTGATGAAGT<br>A              | <i>Bam</i> HI          | pQE-30<br><i>Bam</i> HI- <i>Kpn</i> I    | EcAB4-9<br>(MG1655 <i>yhcB::CAT</i><br><i>MVA</i> +) ) |
|               | <b>pQE-CMKKpn</b><br>TCGGTACCTTCAGAAGACTGGGAGAAGTCT                    | <i>Kpn</i> I           |                                          |                                                        |
| <b>HDR</b>    | <b>pQE-HDR-Bam2</b><br>GCGGATCCGAATTCGATGCTAAGAAATTCAG<br>GCAC         | <i>Bam</i> HI          | pQE-30<br><i>Bam</i> HI- <i>Hind</i> III | MG1655 <i>ara</i> <math>\Delta</math> <i>ispH</i>      |
|               | <b>pQE-HDR-Bam3</b><br>GCGGATCCGAACAGAGCACAGAGCTGATGAA<br>C            | <i>Bam</i> HI          |                                          |                                                        |
|               | <b>pQE-HDR-Hind</b><br>GCAAGCTTCTATGCCAGTTGAAGGGCTTCTCAC<br>G          | <i>Hind</i> III        |                                          |                                                        |

**Supplemental Table S2.** Details of primer sequences and cloning procedures used to express proteins for functional validation.

| Enzyme           | Primer     | Séquence (5'-3')       |
|------------------|------------|------------------------|
| DXS2.1           | qDXS-up    | TTGATGTAGGTATTGCCGAGCA |
|                  | qDXS-down  | ACAATGAGTGGGTCCATCTGC  |
| DXS2.2           | qDXS2-up   | GCTACAGTTGTGTATGCCCGA  |
|                  | qDXS2-down | TTCAAAGCCAAGAAGTGTGCC  |
| DXR              | qDXR-up    | GCAGCAAATGAGAAGGCAGTT  |
|                  | qDXR-down  | GGGCTCAAACCAAGACTGTTC  |
| CMS              | qCMS-up    | GCAACTTTGTCTCCTCAGCATT |
|                  | qCMS-down  | GCAACTTTGTCTCCTCAGCATT |
| CMK              | qCMK-up    | AAAGATTGAAGCAGCGTGTGC  |
|                  | qCMK-down  | AGAGGCTTCAGACAAGGAAACG |
| MECS             | qMECS-up   | TAGAGGATGCGAGGCTCACT   |
|                  | qMECS-down | TCATAACCTGCCTCGTCCATC  |
| HDS              | qHDS-up    | GTCCCTTACTGAACCTCCAGAG |
|                  | qHDS-down  | AATCACCTGTCTGCGTTGG    |
| HDR              | qHDR-up    | GATTGAGAGGACGATGATGCGT |
|                  | qHDR-down  | AGTTCACCCCTCCAACGACT   |
| RPS9<br>AJ749993 | qRPS9-for  | TTACAAGTCCCTTCGGTGGT   |
|                  | qRPS9-rev  | TTACAAGTCCCTTCGGTGGT   |

Supplemental Table S3. The sequence of primers used in the qRT-PCR analysis.

| Enzyme | Primer sequence (5'-3')                                      | Restriction site added | Plasmids cloning sites                                                   | Fusion protein       |
|--------|--------------------------------------------------------------|------------------------|--------------------------------------------------------------------------|----------------------|
| DXS2.1 | <b>DXS-GFP-S</b><br>ATAGATCTTATGGCGGTTTCCGGGGCT              | <i>Bgl</i> III         | pSCA-cassette-GFPi<br>pSCA-cassette-YFPi<br><i>Bgl</i> III- <i>Spe</i> I | DXS-GFP<br>DXS-YFP   |
|        | <b>DXS-GFP-AS</b><br>CGACTAGTTTGAAGTTTAAGGGTTCT              | <i>Spe</i> I           |                                                                          |                      |
| DXS2.2 | <b>DXS2-GFP-S</b><br>AGGCTAGCATGGCGGTGGCATCGAAT              | <i>Nhe</i> I           | pSCA-cassette-GFPi<br>pSCA-cassette-YFPi<br><i>Spe</i> I                 | DXS2-GFP<br>DXS2-YFP |
|        | <b>DXS2-GFP-AS</b><br>CGGCTAGCAAACCTGGAGAAGTGAAGAG           | <i>Nhe</i> I           |                                                                          |                      |
| DXR    | <b>DXR-GFP-S</b><br>GGAGATCTTATGGCTTTGAATTGCTGTCC            | <i>Bgl</i> III         | pSCA-cassette-GFPi<br>pSCA-cassette-YFPi<br><i>Bgl</i> III- <i>Spe</i> I | DXR-GFP<br>DXR-YFP   |
|        | <b>DXR-GFP-AS</b><br>GGACTAGTGGCAGGGCTCAAACCAAGACT           | <i>Spe</i> I           |                                                                          |                      |
| CMS    | <b>CMS-GFP-S</b><br>CGAGATCTTATGTCAATTCTTCGGCTC              | <i>Bgl</i> III         | pSCA-cassette-GFPi<br><i>Bgl</i> III- <i>Spe</i> I                       | CMS-GFP              |
|        | <b>CMS-GFP-AS</b><br>CGACTAGTAGCAGAGATGGGATTCAA              | <i>Spe</i> I           |                                                                          |                      |
| CMK    | <b>CMK-GFP-S</b><br>GCACTAGTATGGCTTCTCCTCAGTCTCTATG<br>TGGT  | <i>Spe</i> I           | pSCA-cassette-GFPi<br><i>Spe</i> I                                       | CMK-GFP              |
|        | <b>CMK-GFP-AS</b><br>GCACTAGTCTATTCAGAAGACTGGGAGAAGT<br>CTGT | <i>Spe</i> I           |                                                                          |                      |
| MECS   | <b>MECS-GFP-S</b><br>TCAGATCTTATGGCTATGGCGACTTCT             | <i>Bgl</i> III         | pSCA-cassette-GFPi<br><i>Spe</i> I                                       | MECS-GFP             |
|        | <b>MECS-GFP-AS</b><br>GCACTAGTCTTCTCATAAGAAGTAC              | <i>Spe</i> I           |                                                                          |                      |
| HDS    | <b>HDS-GFP-S</b><br>GGAGATCTGATGGCACCAGGACAGTTC              | <i>Bgl</i> III         | pSCA-cassette-GFPi<br>pSCA-cassette-YFPi<br><i>Bgl</i> III- <i>Spe</i> I | HDS-GFP<br>HDS-YFP   |
|        | <b>HDS-GFP-AS</b><br>GGACTAGTGTCTTCTGCAGGAGGATCAACC          | <i>Spe</i> I           |                                                                          |                      |
| HDR    | <b>HDR-GFP-S</b><br>GCAGATCTTATGGCAATCTCTCTCCAA              | <i>Bgl</i> III         | pSCA-cassette-GFPi<br><i>Bgl</i> III- <i>Spe</i> I                       | HDR-GFP              |
|        | <b>HDR-GFP-AS</b><br>TAACTAGTTGCCAGTTGAAGGGCTTC              | <i>Spe</i> I           |                                                                          |                      |

Supplemental Table S4. Details of primer sequences and cloning procedure used to express full-length MEP pathway enzyme fused to FP.

| Enzyme | Primer sequence (5'-3')                                               | Restriction site added | Plasmids<br><i>cloning sites</i>                                        | Fusion protein         |
|--------|-----------------------------------------------------------------------|------------------------|-------------------------------------------------------------------------|------------------------|
| DXS2.1 | <b>DXS-GFP-S</b><br>ATAGATCTTATGGCGGTTTCCGGGGCT                       | <i>Bgl</i> II          | pSCA-cassette-GFPi<br><i>Bgl</i> II- <i>Spe</i> I                       | tpDXS-GFP              |
|        | <b>peptideL-DXSrev</b><br>GCCTAGTTGCTCTAAGTTCTGCAGCGAGCT<br>G         | <i>Spe</i> I           |                                                                         |                        |
| DXS2.2 | <b>DXS2-GFP-S</b><br>AGGCTAGCATGGCGGTGGCATCGAAT                       | <i>Nhe</i> I           | pSCA-cassette-GFPi<br><i>Spe</i> I                                      | tpDXS2-GFP             |
|        | <b>peptideL-DXS2rev</b><br>GCGCTAGCGATGGTATCCAAAATAGGAGTAA<br>AAGGCTT | <i>Nhe</i> I           |                                                                         |                        |
| DXR    | <b>DXR-GFP-S</b><br>GGAGATCTTATGGCTTTGAATTCGCTGTCC                    | <i>Bgl</i> II          | pSCA-cassette-GFPi<br>pSCA-cassette-YFPi<br><i>Bgl</i> II- <i>Spe</i> I | tpDXR-GFP<br>tpDXR-YFP |
|        | <b>peptideL-DXRrev</b><br>GCCTAGTATTCTCAGCAACTATATCTAGTG<br>TCTG      | <i>Spe</i> I           |                                                                         |                        |
| HDS    | <b>HDS-GFP-S</b><br>GGAGATCTGATGGCGACCGGAACAGTTC                      | <i>Bgl</i> II          | pSCA-cassette-GFPi<br>pSCA-cassette-YFPi<br><i>Bgl</i> II- <i>Spe</i> I | tpHDS-GFP<br>tpHDS-YFP |
|        | <b>peptideL-HDSrev</b><br>GCCTAGTGTCACTACCAAGGGCTACATTCC<br>C         | <i>Spe</i> I           |                                                                         |                        |

**Supplemental Table S5.** Details of primer sequences and cloning procedure used to fuse the first 100-residues of DXS2.1, DXS2.2, DXR and HDS to GFP.

| Enzyme                                              | Primer sequence (5'-3')                                           | Restriction site added | Plasmids<br><i>cloning sites</i>                    | Fusion protein                |
|-----------------------------------------------------|-------------------------------------------------------------------|------------------------|-----------------------------------------------------|-------------------------------|
| DXR                                                 | <b>DXR-GFP-S</b><br>GGAGATCTTATGGCTTTGAATTCGCTGTCC                | <i>Bgl</i> II          | pSCA-cassette-YFPi<br><i>Bgl</i> II- <i>Spe</i> I   | tpDXR(1-83)-<br>YFP           |
|                                                     | <b>peptideL-DXRrev2</b><br>GCCTAGTAACTATTGAAATGGGCTTCTGAC<br>CTTC | <i>Spe</i> I           |                                                     |                               |
|                                                     | <b>DXR-C-for2</b><br>GCCTAGTGGCTCTACAGGCTCAGTAGGAAC<br>TCAG       | <i>Spe</i> I           | pSCA-cassette-YFPi-<br>tpDXR(1-83)<br><i>Nhe</i> I  | Tp(1-83)-YFP-<br>DXR(84-474)  |
| HDS                                                 | <b>DXR-GFP-AS</b><br>GGACTAGTGGCAGGGCTCAAACCAAGACT                | <i>Spe</i> I           |                                                     |                               |
|                                                     | <b>HDS-GFP-S</b><br>GGAGATCTGATGGCGACCGGAACAGTTC                  | <i>Bgl</i> II          | pSCA-cassette-YFPi<br><i>Bgl</i> II- <i>Spe</i> I   | tpHDS(1-100)-<br>YFP          |
|                                                     | <b>peptideL-HDSrev</b><br>GCCTAGTGTCACTACCAAGGGCTACATTCC<br>C     | <i>Spe</i> I           |                                                     |                               |
|                                                     | <b>HDS-C-for2</b><br>GCCTAGTATGGTTGGGAATGTAGCCCTGG<br>TAGTGAC     | <i>Spe</i> I           | pSCA-cassette-YFPi-<br>tpHDS(1-100)<br><i>Nhe</i> I | tp(1-100)-YFP-<br>HDS(91-740) |
| <b>HDS-GFP-AS</b><br>GGACTAGTGTCTTCTGCAGGAGGATCAACC | <i>Spe</i> I                                                      |                        |                                                     |                               |

**Supplemental Table S6.** Details of primer sequences and cloning procedures used to create internal YFP fusion for DXR and HDS.

| Enzyme | Primer sequence (5'-3')                                       | Restriction site added | Plasmids<br><i>cloning sites</i>  | Fusion protein |
|--------|---------------------------------------------------------------|------------------------|-----------------------------------|----------------|
| CAB1   | <b>CAB1-for</b><br>GCACTAGTATGGCCGCCTCAACAATGGC               | <i>SpeI</i>            | pSCA-cassette-CFPi<br><i>SpeI</i> | CAB-CFP        |
|        | <b>CAB1-rev</b><br>GCACTAGTCTTTCCGGGAACAAAGTTGGTGGC           | <i>SpeI</i>            |                                   |                |
| TIC40  | <b>TIC40-for</b><br>GCACTAGTATGGAGAACCTTACCCTAGTTCTTGCT       | <i>SpeI</i>            | pSCA-cassette-CFPi<br><i>SpeI</i> | TIC-CFP        |
|        | <b>TIC40-rev</b><br>GCACTAGTACCCGTCATTCCTGGGAAGAGC            | <i>SpeI</i>            |                                   |                |
| CCD4   | <b>CCD4-for</b><br>GCACTAGTATGGACTCTGTTTCTTCTTCTTCTTCC        | <i>SpeI</i>            | pSCA-cassette-CFPi<br><i>SpeI</i> | CCD4-CFP       |
|        | <b>CCD4-rev</b><br>GCACTAGTAAGCTTATTAAGGTCACTTTTCTTGACAAATAAC | <i>SpeI</i>            |                                   |                |

**Supplemental Table S7.** Details of primer sequences and cloning procedures used to create plastid subcompartment CFP-markers of. The CAB1 (chlorophyll a/b binding protein 1, At1g29930), TIC40 (translocon at the inner envelope of chloroplasts, At5g16620), CCD4 (carotenoid cleavage dioxygenase 4, At4g19170) proteins of *A. thaliana* were used as a marker of thylakoid, inner membrane of plastid and plastoglobuli, respectively. The coding sequence of these proteins was amplified using retro-transcribed RNA extracted from *A. thaliana* as a matrix.

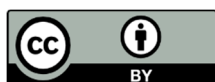

© 2020 by the authors. Submitted for possible open access publication under the terms and conditions of the Creative Commons Attribution (CC BY) license (<http://creativecommons.org/licenses/by/4.0/>).
